# Supplementary material
Source: publisher site journal article supplement (https://www.dovepress.com/article/257016)
Supplement: Supplementary file 1 [file get_supplementary_file.php]

# Title: Development and validation of a prognostic nomogram to predict the long-time prognosis in Non-B, Non-C Hepatocellular Carcinoma

**Authors:** Kongying Lin1*, Qizhen Huang2*, Yuting Huo3*, Jianxing Zeng1, Zongren Ding1, Zhenwei Chen4, Pengfei Guo4, Yongyi Zeng1†, Jingfeng Liu1,4†

**Figure S1: The flowchart for patient collection.**

**
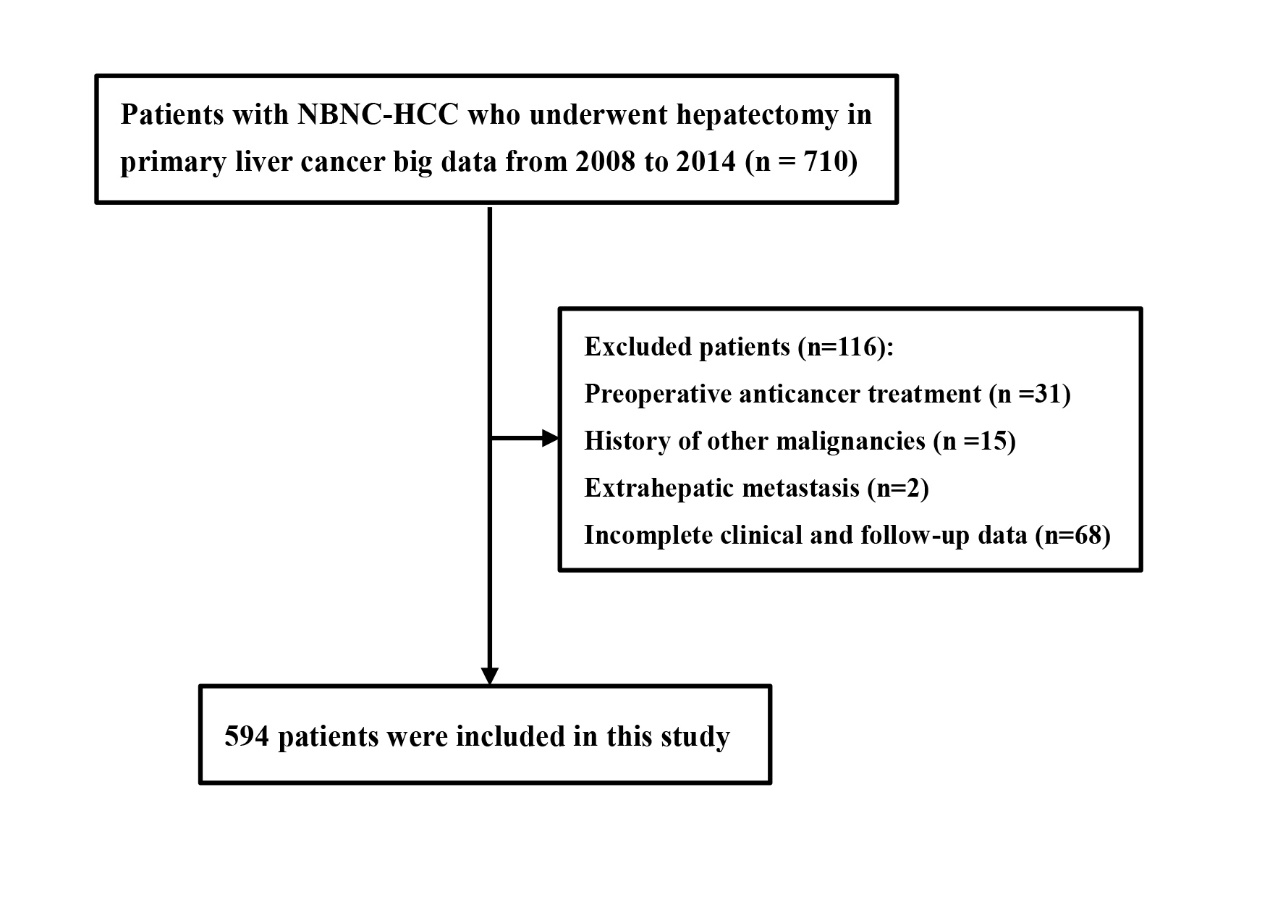
Table S1：tdAUC and 95%CI in the different prognostic models for OS.**

| **Current model** | **Year rate** | **Training cohort (n=396)** | **Validation cohort (n=198)** |
| --- | --- | --- | --- |
|  | 1-year | 0.775(0.702-0.847) | 0.789(0.710-0.868) |
|  | 2-year | 0.743(0.684-0.802) | 0.793(0.718-0.868) |
| Nomogram | 3-year | 0.736(0.681-0.791) | 0.751(0.670-0.832) |
|  | 4-year | 0.749(0.696-0.802) | 0.720(0.637-0.803) |
|  | 5-year | 0.743(0.683-0.803) | 0.686(0.594-0.779) |
|  | 1-year | 0.699(0.624-0.774) | 0.702(0.607-0.798) |
|  | 2-year | 0.670(0.611-0.729) | 0.692(0.610-0.773) |
| BCLC staging system | 3-year | 0.655(0.604-0.706) | 0.650(0.576-0.723) |
|  | 4-year | 0.680(0.634-0.726) | 0.643(0.575-0.710) |
|  | 5-year | 0.649(0.599-0.699) | 0.604(0.532-0.676) |
|  | 1-year | 0.722(0.649-0.795) | 0.723(0.637-0.809) |
|  | 2-year | 0.683(0.621-0.745) | 0.715(0.633-0.796) |
| AJCC staging system | 3-year | 0.690(0.635-0.744) | 0.672(0.593-0.752) |
|  | 4-year | 0.710(0.660-0.761) | 0.667(0.590-0.743) |
|  | 5-year | 0.675(0.617-0.733) | 0.626(0.539-0.713) |
|  | 1-year | 0.734(0.666-0.802) | 0.742(0.642-0.842) |
|  | 2-year | 0.688(0.626-0.750) | 0.728(0.639-0.818) |
| model of Zhang | 3-year | 0.693(0.636-0.750) | 0.673(0.580-0.765) |
|  | 4-year | 0.696(0.639-0.753) | 0.674(0.588-0.760) |
|  | 5-year | 0.690(0.624-0.755) | 0.638(0.542-0.734) |

Abbreviations: BCLC, Barcelona Clinic Liver Cancer staging system; AJCC, American Joint Committee on Cancer.
